# Supplementary material for: Computational prediction of microRNA networks incorporating environmental toxicity and disease etiology
Source: PubMed Central journal article supplement — Sci Rep. 2014 Jul 4;4:5576. doi: 10.1038/srep05576 (PMC4081875; doi:10.1038/srep05576), 2014-07-04
Supplement: srep05576-s1.pdf [file srep05576-s1.pdf]

# **Computational prediction of microRNA networks incorporating environmental toxicity and disease etiology**

Jie Li<sup>a</sup>, Zengrui Wu<sup>a</sup>, Feixiong Cheng<sup>a,\*</sup>, Weihua Li<sup>a</sup>, Guixia Liu<sup>a</sup>, Yun Tang<sup>a,b,\*</sup>.

<sup>a</sup> Shanghai Key Laboratory of New Drug Design, School of Pharmacy, East China University of Science and Technology, 130 Meilong Road, Shanghai 200237, China;

<sup>b</sup> Key Laboratory of Cigarette Smoke, Technical Center, Shanghai Tobacco Group Co. Ltd., Shanghai 200082, China.

\*To whom correspondence should be addressed.

Tel: +86-21-6425-1052; Fax, +86-21-6425-3651. E-mail: ytang234@ecust.edu.cn (Y. T.),  
fxcheng1985@gmail.com (F. C.).

## Supplementary Legends:

### Supplementary Figure S1:

Topological features of EMA, MDA and EDA networks. Box plots show the minimum, lower quartile, median, upper quartile and the maximum about (a) connectivity distribution, (b) clustering coefficient distribution and (c) betweenness distribution. Histogram (d) explains the average topological features of three bipartite networks, where  $C \times 10^{-1}$  and  $B \times 10^{-3}$ . EMA: EF-miRNA association; MDA: miRNA-disease association; EDA: EF-disease association. E\_EMA and E\_EDA are the abbreviations for EF nodes in EMA network and EDA network respectively.

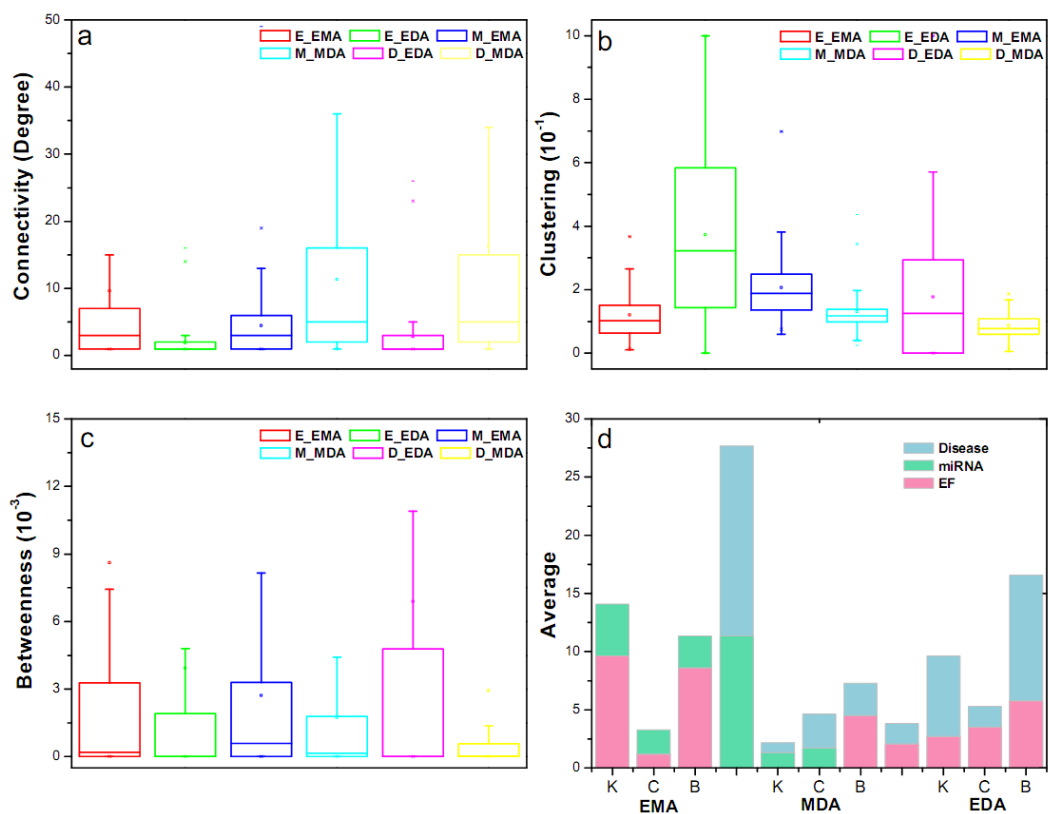

**Supplementary Figure S2:**

Similarity hot maps of (a) EF structure Tanimoto similarity and (b) disease phenotypic similarity. Some EFs don't have exact structure information, so similarities between them and others are zero.

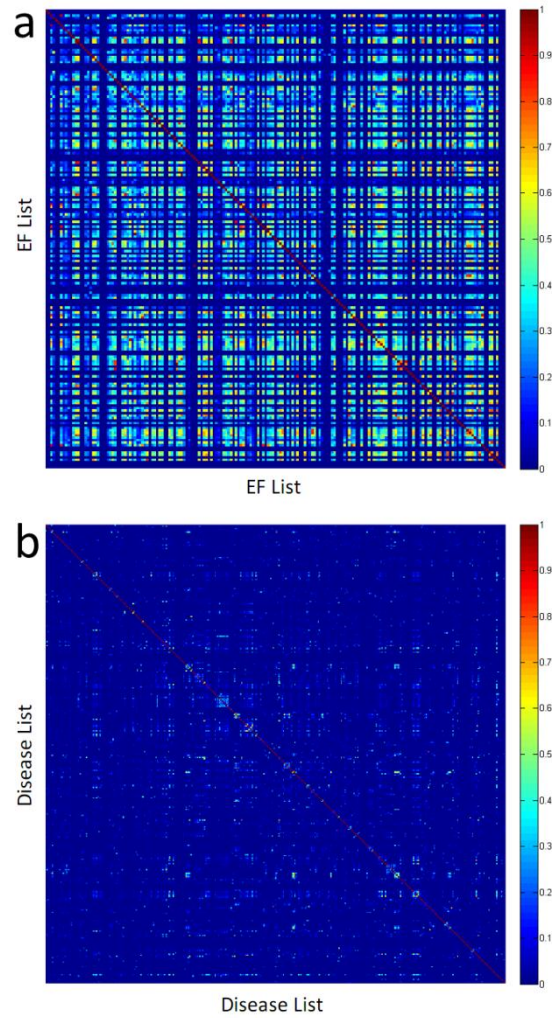

## Supplementary Table S1:

Seen profile dataset lists.xls online

## Supplementary Table S2:

Predicted list of potential EFs for breast neoplasms

| ID | Name                    | Ref.  | Known related miRNAs <sup>a</sup> (hsa-)                                                                                                                                                                                                                                                                                                                                                                                                                                                                                                                                                                    |
|----|-------------------------|-------|-------------------------------------------------------------------------------------------------------------------------------------------------------------------------------------------------------------------------------------------------------------------------------------------------------------------------------------------------------------------------------------------------------------------------------------------------------------------------------------------------------------------------------------------------------------------------------------------------------------|
| 1  | Radiation               | 1-3   | mir-663, mir-638, mir-451, mir-34b, mir-125b-2, mir-9-3, mir-9-2, mir-9-1, mir-145, mir-125b-1, mir-15b, let-7i, let-7g, mir-222, mir-221, mir-214, mir-181a-1, mir-210, mir-205, mir-181a-2, mir-100, mir-31, mir-26b, mir-24-2, mir-24-1, mir-21, let-7f-2, let-7f-1, let-7e, let-7d, let-7c, let-7b, let-7a-3, let-7a-2, let-7a-1                                                                                                                                                                                                                                                                        |
| 2  | Irradiation             | 4-6   | mir-103b-2, mir-103b-1, mir-625, mir-570, mir-495, mir-452, mir-451, mir-20b, mir-148b, mir-151, mir-340, mir-374a, mir-301a, mir-299, mir-101-2, mir-29c, mir-106b, mir-128-2, mir-155, mir-195, mir-193a, mir-126, mir-145, mir-143, mir-140, mir-130a, mir-128-1, mir-15b, let-7i, let-7g, mir-222, mir-221, mir-199a-2, mir-199a-1, mir-148a, mir-16-2, mir-106a, mir-103a-1, mir-103a-2, mir-101-1, mir-96, mir-93, mir-92a-1, mir-29a, mir-27a, mir-26b, mir-24-2, mir-24-1, mir-22, mir-21, mir-20a, mir-19b-1, mir-19a, mir-18a, mir-17, mir-16-1, let-7f-2, let-7f-1, let-7a-3, let-7a-2, let-7a-1 |
| 3  | Ionizing Radiation      | 7-9   | mir-421, mir-503, mir-148b, mir-302b, mir-101-2, mir-200a, mir-29c, mir-127, mir-125a, mir-15b, let-7i, let-7g, mir-222, mir-221, mir-7-1, mir-16-2, mir-101-1, mir-100, mir-92a-2, mir-92a-1, mir-27a, mir-26b, mir-21, mir-20a, mir-19a, mir-18a, mir-17, mir-16-1, mir-15a, let-7f-2, let-7f-1, let-7e, let-7d, let-7c, let-7b, let-7a-3, let-7a-2, let-7a-1                                                                                                                                                                                                                                             |
| 4  | Gemcitabine             | 10,11 | mir-320e, mir-320d-2, mir-320c-2, mir-320d-1, mir-374b, mir-320b-2, mir-320c-1, mir-320b-1, mir-202, mir-409, mir-345, mir-339, mir-324, mir-326, mir-337, mir-342, mir-328, mir-374a, mir-373, mir-302c, mir-299, mir-128-2, mir-181b-2, mir-155, mir-200c, mir-320a, mir-194-1, mir-186, mir-149, mir-129-2, mir-133a-1, mir-132, mir-128-1, mir-1-2, mir-200b, mir-181a-1, mir-211, mir-205, mir-204, mir-199a-2, mir-181b-1, mir-181a-2, mir-139, mir-197, mir-29b-2, mir-29b-1, mir-26a-1, mir-24-1, mir-21, mir-16-1, let-7f-2, let-7e, let-7d, let-7c, let-7b, let-7a-1, mir-374c                    |
| 5  | Resveratrol             | 12-14 | mir-663, mir-520h, mir-155, mir-146a                                                                                                                                                                                                                                                                                                                                                                                                                                                                                                                                                                        |
| 6  | all-trans Retinoic Acid | 15,16 | mir-342, mir-181b-2, mir-152, mir-23b, mir-15b, mir-223, mir-181b-1, mir-10a, mir-16-2, mir-107, mir-23a, mir-16-1, mir-15a, let-7d, let-7c, let-7a-3, let-7a-2, let-7a-1                                                                                                                                                                                                                                                                                                                                                                                                                                   |

<sup>a</sup>Known EMAs were extracted from the experimentally supported dataset used and these miRNAs were verified related to breast neoplasms.

### Supplementary Table S3:

Predicted list of new candidate miRNAs for breast neoplasms.

| ID | Name           | Validation <sup>a</sup> | Related EFs <sup>b</sup>                                                                                                                                             |
|----|----------------|-------------------------|----------------------------------------------------------------------------------------------------------------------------------------------------------------------|
| 1  | hsa-mir-142    | PhenomiR                | Topotecan, Irradiation                                                                                                                                               |
| 2  | hsa-mir-150    | PhenomiR                | Cigarette Smoke (tobacco), Ppioids (morphine and heroin), BJA32515, Arsenic Trioxide (ATO)                                                                           |
| 3  | hsa-mir-19b-2  | PhenomiR                | 5-fluorouracil (5-FU)                                                                                                                                                |
| 4  | hsa-mir-372    | PhenomiR                | Gemcitabine, BJA32515, Arsenic Trioxide (ATO)                                                                                                                        |
| 5  | hsa-mir-181d   | PhenomiR                | Cigarette Smoke (tobacco), Imatinib, Epigallocatechin Gallate (EGCG), Arsenic Trioxide (ATO), Docetaxel                                                              |
| 6  | hsa-mir-196b   | PhenomiR                | Hepatitis C Virus (HCV), Heat Stress, Imatinib, Decitabine (5-aza-2'-deoxycytidine (5-Aza-CdR))                                                                      |
| 7  | hsa-mir-194-2  | PhenomiR                | Docetaxel                                                                                                                                                            |
| 8  | hsa-mir-542    | <sup>17</sup>           | anti-benzo[a]pyrene-trans-7,8-diol-9,10-epoxide, BJA32515, 17beta-estradiol (E(2)), Medroxyprogesterone Acetate, ICI-182780 and RU-486                               |
| 9  | hsa-mir-494    | PhenomiR                | Lithium, Benzo(a)pyrene (BaP), Diesel Exhaust Particles, 5-aza-2'-deoxycytidine (5-Aza-CdR) and/or Phenylbutyric acid (PBA)                                          |
| 10 | hsa-mir-208    | PhenomiR                | BJA32515, Unsaturated Fatty Acids                                                                                                                                    |
| 11 | hsa-mir-130b   | PhenomiR                | Hepatitis C Virus (HCV), Titanium and Anatase Coating (AC), Hypoxia                                                                                                  |
| 12 | hsa-mir-708    | <sup>18</sup>           | N/A                                                                                                                                                                  |
| 13 | hsa-mir-134    | PhenomiR                | Lithium and Valproate, Imatinib, 5-aza-2'-deoxycytidine (5-Aza-CdR) and/or Phenylbutyric acid (PBA), BJA32515, Etoposide (VP-16), Doxorubicin (Dox), Cisplatin (CIS) |
| 14 | hsa-mir-144    | PhenomiR                | Irradiation, Ionizing Radiation, BJA32515, Arsenic Trioxide (ATO)                                                                                                    |
| 15 | hsa-mir-212    | PhenomiR                | Interleukin (IL)-12, Alcohol, Imatinib, Gemcitabine, BJA32515, Arsenic Trioxide (ATO), Docetaxel                                                                     |
| 16 | hsa-mir-185    | PhenomiR                | Irradiation, Folate, Cisplatin/Fluorouracil (CF) , 5-fluorouracil (5-FU), Cisplatin (CIS)                                                                            |
| 17 | hsa-mir-363    | dbDEMC                  | Cigarette Smoke (tobacco), Cisplatin/Fluorouracil (CF) , Benzo(a)pyrene (BaP), Arsenic Trioxide (ATO)                                                                |
| 18 | hsa-mir-32     | PhenomiR                | Arsenic Trioxide (ATO)                                                                                                                                               |
| 19 | hsa-mir-491    | PhenomiR                | N/A                                                                                                                                                                  |
| 20 | hsa-mir-28     | PhenomiR                | Opioids (morphine and heroin)                                                                                                                                        |
| 21 | hsa-mir-370    | PhenomiR                | BJA32515                                                                                                                                                             |
| 22 | hsa-mir-184    | PhenomiR                | Arsenic Trioxide (ATO)                                                                                                                                               |
| 23 | hsa-mir-371    | PhenomiR                | Docetaxel                                                                                                                                                            |
| 24 | hsa-mir-376a-2 | dbDEMC                  | Irradiation, BJA32515                                                                                                                                                |
| 25 | hsa-mir-95     | PhenomiR                | Cisplatin/Fluorouracil (CF)                                                                                                                                          |
| 26 | hsa-mir-376a-1 | PhenomiR                | Irradiation, BJA32515                                                                                                                                                |
| 27 | hsa-mir-449b   | <sup>19</sup>           | Grape Seed Proanthocyanidin, Doxorubicin (Dox), Hypoxia                                                                                                              |
| 28 | hsa-mir-362    | dbDEMC                  | Irradiation, Cigarette Smoke (tobacco)                                                                                                                               |
| 29 | hsa-mir-449a   | PhenomiR                | HDAC Inhibitor: Apicidin and TSA, Doxorubicin (Dox), Hypoxia                                                                                                         |
| 30 | hsa-mir-502    | dbDEMC                  | Irradiation, Docetaxel                                                                                                                                               |

(Continued)

| <b>ID</b> | <b>Name</b>   | <b>Validation<sup>a</sup></b> | <b>Related EFs<sup>b</sup></b>                                                                     |
|-----------|---------------|-------------------------------|----------------------------------------------------------------------------------------------------|
| 31        | hsa-mir-1224  | <sup>20</sup>                 | Cocoa Proanthocyanidin, Grape Seed Proanthocyanidin                                                |
| 32        | hsa-mir-208b  | Null                          | BJA32515, Unsaturated Fatty Acids                                                                  |
| 33        | hsa-mir-381   | PhenomiR                      | BJA32515, Cisplatin (CIS)                                                                          |
| 34        | hsa-mir-219-2 | PhenomiR                      | N/A                                                                                                |
| 35        | hsa-mir-498   | PhenomiR                      | Benzo(a)pyrene (BaP), 5-aza-2'-deoxycytidine (5-Aza-CdR) and/or Phenylbutyric acid (PBA), BJA32515 |
| 36        | hsa-mir-532   | dbDEMC                        | Cocoa Proanthocyanidin, Lipopolysaccharide (LPS), Grape Seed Proanthocyanidin                      |
| 37        | hsa-mir-484   | PhenomiR                      | BJA32515                                                                                           |
| 38        | hsa-mir-590   | dbDEMC                        | Irradiation                                                                                        |
| 39        | hsa-mir-744   | <sup>21</sup>                 | Irradiation, Grape Seed Proanthocyanidin                                                           |
| 40        | hsa-mir-154   | PhenomiR                      | Gemcitabine                                                                                        |

<sup>a</sup> Validation information was firstly found in PhenomiR database<sup>22</sup> V2.0. Then, others left were got from dbDEMC database<sup>23</sup> or literatures.

<sup>b</sup> EFs listed here were verified altering the former miRNA expression in the dataset used.

**Supplementary Table S4:**Known and top 10 predicted lists of subtype-specific EFs for luminal and basal breast cancer.<sup>a</sup>

| <b>Luminal Subtype</b> |                             | <b>Basal Subtype</b> |                    |
|------------------------|-----------------------------|----------------------|--------------------|
| <b>ID</b>              | <b>Name</b>                 | <b>ID</b>            | <b>Name</b>        |
| 1                      | Nutlin-3a                   | 1                    | Cisplatin (CIS)    |
| 2                      | Tamoxifen (TAM)             | 2                    | Docetaxel          |
|                        |                             | 3                    | Erlotinib          |
| 1                      | Diethylstilbestrol          | 1                    | Paclitaxel (Taxol) |
| 2                      | Etoposide (VP-16)           | 2                    | Radiation          |
| 3                      | 17beta-estradiol (E2)       | 3                    | Gemcitabine        |
| 4                      | Adverse Drug Reaction (ADR) | 4                    | Doxorubicin (Dox)  |
| 5                      | Progestin                   | 5                    | Platinum           |
| 6                      | Docetaxel                   | 6                    | Irradiation        |
| 7                      | Letrozole                   | 7                    | Vincristine (VCR)  |
| 8                      | Doxorubicin (Dox)           | 8                    | Necitumumab        |
| 9                      | Fulvestrant (ICI-182780)    | 9                    | Curcumin           |
| 10                     | Trastuzumab                 | 10                   | Alcohol            |

<sup>a</sup>The predicted lists here were obtained using the NBI algorithm.

**Supplementary Table S5:**

Predicted list of potential miRNAs for tobacco smoke related EFs.

| <b>Name</b>                     | <b>ID</b> | <b>miRNA</b>   | <b>Known related diseases<sup>a</sup></b>                                                                          |
|---------------------------------|-----------|----------------|--------------------------------------------------------------------------------------------------------------------|
| <b>Tobacco</b>                  | 1         | hsa-mir-155    | Gastric Neoplasms, Neoplasms, Lung Neoplasms                                                                       |
|                                 | 2         | hsa-mir-221    | Gastric Neoplasms, Neoplasms, Lung Neoplasms                                                                       |
|                                 | 3         | hsa-let-7a-1   | Gastric Neoplasms, Neoplasms, Lung Neoplasms                                                                       |
|                                 | 4         | hsa-mir-126    | Gastric Neoplasms, Neoplasms, Lung Neoplasms                                                                       |
|                                 | 5         | hsa-mir-27a    | Gastric Neoplasms, Neoplasms                                                                                       |
| <b>Nicotine</b>                 | 1         | hsa-mir-26a-1  | Lung Neoplasms                                                                                                     |
|                                 | 2         | hsa-mir-26a-2  | Lung Neoplasms                                                                                                     |
|                                 | 3         | hsa-mir-181b-1 | Gastric Neoplasms, Neoplasms, Lung Neoplasms                                                                       |
|                                 | 4         | hsa-mir-181b-2 | Gastric Neoplasms, Neoplasms, Lung Neoplasms                                                                       |
|                                 | 5         | hsa-mir-181a-2 | Gastric Neoplasms, Neoplasms, Lung Neoplasms                                                                       |
| <b>Benzo(a)pyrene<br/>(BaP)</b> | 1         | hsa-mir-21     | Epithelial-Mesenchymal Transition ( EMT ) ,<br>Gastric Neoplasms, Neoplasms, Lung Neoplasms,<br>Poor Fetal Outcome |
|                                 | 2         | hsa-let-7a-1   | Gastric Neoplasms, Neoplasms, Lung Neoplasms                                                                       |
|                                 | 3         | hsa-let-7a-2   | Gastric Neoplasms, Neoplasms, Lung Neoplasms                                                                       |
|                                 | 4         | hsa-let-7a-3   | Gastric Neoplasms, Neoplasms, Lung Neoplasms                                                                       |

<sup>a</sup> Diseases listed here were verified related to the former miRNA, whose expression were predicted changed by cigarette smoke related EFs.



## Supplementary Table S6:

Predicted list of new candidate diseases for tobacco smoke related EFs.

| Name     | ID | Disease                        | Known related miRNAs <sup>a</sup> (hsa-)                                                                                                                                                                                                                                                                                                                                                                                                                                                                               |
|----------|----|--------------------------------|------------------------------------------------------------------------------------------------------------------------------------------------------------------------------------------------------------------------------------------------------------------------------------------------------------------------------------------------------------------------------------------------------------------------------------------------------------------------------------------------------------------------|
| Tobacco  | 1  | Glioblastoma                   | mir-181d, mir-146b, mir-128-2, mir-146a, mir-125b-2, mir-128-1, mir-125b-1, mir-200b, mir-205, mir-34a, mir-10b, mir-10a, mir-92a-2, mir-92a-1, mir-31, mir-30a, mir-20a, mir-18a, mir-15a, mir-16-2, mir-106a, mir-21, mir-17, mir-16-1                                                                                                                                                                                                                                                                               |
|          | 2  | Immune Response                | mir-146a, mir-125b-2, mir-125b-1, mir-10a                                                                                                                                                                                                                                                                                                                                                                                                                                                                              |
|          | 3  | Neoplasms                      | mir-320e, mir-320d-2, mir-320c-2, mir-320d-1, mir-320b-2, mir-320c-1, mir-320b-1, mir-498, mir-494, mir-493, mir-18b, mir-362, mir-200c, mir-320a, mir-150, mir-146a, mir-129-2, mir-125b-2, mir-130a, mir-125b-1, mir-200b, mir-205, mir-34a, mir-10b, mir-10a, mir-129-1, mir-99a, mir-92a-2, mir-92a-1, mir-31, mir-30a, mir-20a, mir-18a, mir-15a, mir-363, mir-106b, mir-16-2, mir-106a, mir-21, mir-17, mir-16-1                                                                                                 |
|          | 4  | Carcinoma, Hepatocellular      | mir-320e, mir-320d-2, mir-320c-2, mir-320d-1, mir-320b-2, mir-320c-1, mir-320b-1, mir-500a, mir-498, mir-181d, mir-493, mir-146b, mir-18b, mir-338, mir-365-2, mir-365-1, mir-362, mir-200c, mir-320a, mir-150, mir-146a, mir-129-2, mir-125b-2, mir-130a, mir-125b-1, mir-200b, mir-223, mir-218-2, mir-218-1, mir-205, mir-199b, mir-34a, mir-10b, mir-10a, mir-129-1, mir-99a, mir-92a-2, mir-92a-1, mir-31, mir-30a, mir-20a, mir-18a, mir-15a, mir-106b, mir-16-2, mir-106a, mir-21, mir-17, mir-16-1             |
|          | 5  | Breast Neoplasms               | mir-320e, mir-320d-2, mir-320c-2, mir-320d-1, mir-320b-2, mir-320c-1, mir-320b-1, mir-638, mir-625, mir-500a, mir-493, mir-146b, mir-18b, mir-338, mir-337, mir-365-2, mir-365-1, mir-128-2, mir-200c, mir-320a, mir-146a, mir-129-2, mir-125b-2, mir-130a, mir-128-1, mir-125b-1, mir-200b, mir-223, mir-218-2, mir-218-1, mir-205, mir-199b, mir-34a, mir-10b, mir-10a, mir-129-1, mir-99a, mir-92a-2, mir-92a-1, mir-31, mir-30a, mir-20a, mir-18a, mir-15a, mir-106b, mir-16-2, mir-106a, mir-21, mir-17, mir-16-1 |
| Nicotine | 1  | Colonic Neoplasms              | mir-498, mir-493, mir-365-2, mir-365-1, mir-128-2, mir-200c, mir-146a, mir-125b-2, mir-128-1, mir-125b-1, mir-200b, mir-223, mir-205, mir-34a, mir-10b, mir-92a-1, mir-31, mir-30a, mir-20a, mir-18a, mir-15a, mir-106b, mir-16-2, mir-106a, mir-21, mir-17, mir-16-1                                                                                                                                                                                                                                                  |
|          | 2  | Leukemia                       | mir-18b, mir-125b-2, mir-130a, mir-125b-1, mir-223, mir-199b, mir-34a, mir-99a, mir-92a-2, mir-92a-1, mir-31, mir-20a, mir-18a, mir-15a, mir-16-2, mir-21, mir-17, mir-16-1                                                                                                                                                                                                                                                                                                                                            |
|          | 3  | Carcinoma, Non-Small-Cell Lung | mir-625, mir-146b, mir-337, mir-200c, mir-146a, mir-125b-2, mir-130a, mir-125b-1, mir-200b, mir-223, mir-218-2, mir-218-1, mir-205, mir-199b, mir-34a, mir-30a, mir-15a, mir-16-2, mir-106a, mir-21, mir-17, mir-16-1                                                                                                                                                                                                                                                                                                  |
|          | 4  | Carcinoma, Hepatocellular      | mir-320e, mir-320d-2, mir-320c-2, mir-320d-1, mir-320b-2, mir-320c-1, mir-320b-1, mir-500a, mir-498, mir-181d, mir-493, mir-146b, mir-18b, mir-338, mir-365-2, mir-365-1, mir-362, mir-200c, mir-320a, mir-150, mir-146a, mir-129-2, mir-125b-2, mir-130a, mir-125b-1, mir-200b, mir-223, mir-218-2, mir-218-1, mir-205, mir-199b, mir-34a, mir-10b, mir-10a, mir-129-1, mir-99a, mir-92a-2, mir-92a-1, mir-31, mir-30a, mir-20a, mir-18a, mir-15a, mir-106b, mir-16-2, mir-106a, mir-21, mir-17, mir-16-1             |
|          | 5  | Glioblastoma                   | mir-181d, mir-146b, mir-128-2, mir-146a, mir-125b-2, mir-128-1, mir-125b-1, mir-200b, mir-205, mir-34a, mir-10b, mir-10a, mir-92a-2, mir-92a-1, mir-31, mir-30a, mir-20a, mir-18a, mir-15a, mir-16-2, mir-106a, mir-21, mir-17, mir-16-1                                                                                                                                                                                                                                                                               |

(Continued)

| Name                            | ID | Disease                              | Known related miRNAs <sup>a</sup> (hsa-)                                                                                                                                                                                                                                                                                                                                                                                                                                                                               |
|---------------------------------|----|--------------------------------------|------------------------------------------------------------------------------------------------------------------------------------------------------------------------------------------------------------------------------------------------------------------------------------------------------------------------------------------------------------------------------------------------------------------------------------------------------------------------------------------------------------------------|
| <b>Benzo(a)pyrene<br/>(BaP)</b> | 1  | Breast Neoplasms                     | mir-320e, mir-320d-2, mir-320c-2, mir-320d-1, mir-320b-2, mir-320c-1, mir-320b-1, mir-638, mir-625, mir-500a, mir-493, mir-146b, mir-18b, mir-338, mir-337, mir-365-2, mir-365-1, mir-128-2, mir-200c, mir-320a, mir-146a, mir-129-2, mir-125b-2, mir-130a, mir-128-1, mir-125b-1, mir-200b, mir-223, mir-218-2, mir-218-1, mir-205, mir-199b, mir-34a, mir-10b, mir-10a, mir-129-1, mir-99a, mir-92a-2, mir-92a-1, mir-31, mir-30a, mir-20a, mir-18a, mir-15a, mir-106b, mir-16-2, mir-106a, mir-21, mir-17, mir-16-1 |
|                                 | 2  | Lung Neoplasms                       | mir-638, mir-494, mir-146b, mir-18b, mir-338, mir-365-2, mir-365-1, mir-128-2, mir-200c, mir-150, mir-146a, mir-130a, mir-128-1, mir-125b-1, mir-200b, mir-223, mir-218-2, mir-205, mir-199b, mir-34a, mir-10b, mir-92a-1, mir-31, mir-30a, mir-20a, mir-18a, mir-106b, mir-106a, mir-21, mir-17                                                                                                                                                                                                                       |
|                                 | 3  | Carcinoma,<br>Non-Small-Cell<br>Lung | mir-625, mir-146b, mir-337, mir-200c, mir-146a, mir-125b-2, mir-130a, mir-125b-1, mir-200b, mir-223, mir-218-2, mir-218-1, mir-205, mir-199b, mir-34a, mir-30a, mir-15a, mir-16-2, mir-106a, mir-21, mir-17, mir-16-1                                                                                                                                                                                                                                                                                                  |
|                                 | 4  | Ovarian<br>Neoplasms                 | mir-625, mir-181d, mir-146b, mir-338, mir-200c, mir-320a, mir-146a, mir-125b-2, mir-130a, mir-125b-1, mir-200b, mir-223, mir-218-1, mir-34a, mir-99a, mir-92a-1, mir-31, mir-30a, mir-20a, mir-18a, mir-106b, mir-21, mir-17, mir-16-1                                                                                                                                                                                                                                                                                 |

<sup>a</sup>miRNAs listed here were those related to the former disease and could be altered by cigarette smoke related EFs.

## References for Supplementary Information:

1. Preston, D. L. *et al.* Radiation effects on breast cancer risk: a pooled analysis of eight cohorts. *Radiat Res* **158**, 220-235 (2002).
2. Boice Jr, J. D., Land, C. E., Shore, R. E., Norman, J. E. & Tokunaga, M. Risk of breast cancer following low-dose radiation exposure 1. *Radiology* **131**, 589-597 (1979).
3. Nguyen, D. H. *et al.* Radiation acts on the microenvironment to affect breast carcinogenesis by distinct mechanisms that decrease cancer latency and affect tumor type. *Cancer Cell* **19**, 640-651 (2011).
4. Clemons, M., Loijens, L. & Goss, P. Breast cancer risk following irradiation for hodgkin's disease. *Cancer Treat Rev* **26**, 291-302 (2000).
5. Adams, M. J. *et al.* Breast cancer risk 55+ years after irradiation for an enlarged thymus and its implications for early childhood medical irradiation today. *Cancer Epidem Biomar* **19**, 48-58 (2010).
6. Modan, B., Alfandary, E., Chetrit, A. & Katz, L. Increased risk of breast cancer after low-dose irradiation. *Lancet* **333**, 629-631 (1989).
7. Hu, J. J., Smith, T. R., Miller, M. S., Lohman, K. & Case, L. D. Genetic regulation of ionizing radiation sensitivity and breast cancer risk. *Environ Mol Mutagen* **39**, 208-215 (2002).
8. Land, C. E., Boice, J. D., Shore, R. E., Norman, J. E. & Tokunaga, M. Breast cancer risk from low-dose exposures to ionizing radiation: Results of parallel analysis of three exposed populations of women. *J Nat Cancer I* **65**, 353-376 (1980).
9. Millikan, R. C., Player, J. S., deCotret, A. R., Tse, C. K. & Keku, T. Polymorphisms in DNA repair genes, medical exposure to ionizing radiation, and breast cancer risk. *Cancer Epidem Biomar* **14**, 2326-2334 (2005).
10. Li, Y. W. *et al.* Up-regulation of *miR-200* and *let-7* by natural agents leads to the reversal of epithelial-to-mesenchymal transition in gemcitabine-resistant pancreatic cancer cells. *Cancer Res* **69**, 6704-6712 (2009).
11. Dent, S., Messersmith, H. & Trudeau, M. Gemcitabine in the management of metastatic breast cancer: A systematic review. *Breast Cancer Res Tr* **108**, 319-331 (2008).
12. Athar, M. *et al.* Resveratrol: A review of preclinical studies for human cancer prevention. *Toxicol Appl Pharm* **224**, 274-283 (2007).
13. Tili, E. *et al.* Resveratrol decreases the levels of miR-155 by upregulating miR-663, a microRNA targeting *JunB* and *JunD*. *Carcinogenesis* **31**, 1561-1566 (2010).
14. Tili, E. & Michaille, J. J. Resveratrol, microRNAs, inflammation, and cancer. *J Nucleic Acids* **2011**, 102431 (2011).
15. Bryan, M. *et al.* A pilot phase II trial of *all-trans* retinoic acid (Vesanoid) and paclitaxel (Taxol) in patients with recurrent or metastatic breast cancer. *Invest New Drug* **29**, 1482-1487 (2011).
16. Rahim, R. & Strobl, J. S. Hydroxychloroquine, chloroquine, and *all-trans* retinoic acid regulate growth, survival, and histone acetylation in breast cancer cells. *Anti-cancer Drug* **20**, 736-745 (2009).
17. Dvinge, H. *et al.* The shaping and functional consequences of the microRNA landscape in breast cancer. *Nature* **497**, 378-382 (2013).
18. Ryu, S. *et al.* Suppression of miRNA-708 by polycomb group promotes metastases by calcium-induced cell migration. *Cancer Cell* **23**, 63-76 (2013).
19. Hannafon, B. N., Sebastiani, P., de Las Morenas, A., Lu, J. & Rosenberg, C. L. Expression of microRNA and their gene targets are dysregulated in preinvasive breast cancer. *Breast Cancer Res* **13**, R24 (2011).
20. Shah, M. Y., Pan, X., Fix, L. N., Farwell, M. A. & Zhang, B. 5-fluorouracil drug alters the microRNA expression profiles in MCF-7 breast cancer cells. *J Cell Physiol* **226**, 1868-1878 (2011).
21. Leivonen, S. K. *et al.* High-throughput screens identify microRNAs essential for HER2 positive breast cancer cell growth. *Mol Oncol* **8**, 93-104(2014).

22. Ruepp, A. *et al.* PhenomiR: a knowledgebase for microRNA expression in diseases and biological processes. *Genome Biol* **11**, R6 (2010).
23. Yang, Z. *et al.* dbDEMC: a database of differentially expressed miRNAs in human cancers. *BMC Genomics* **11**, S5 (2010).
